# Supplementary material for: Study of the magnetic interface and its effect in Fe/NiFe bilayers of alternating order
Source: Royal Society of Chemistry journal article supplement (doi:10.1039/d0ra05429a), 2020-01-01
Supplement: d0ra05429a1.pdf [file d0ra05429a1.pdf]

## Study of magnetic interface and its effect in Fe/NiFe bilayers of alternating order

### Supplementary Information

We have performed the FMR measurements again for the sample S2. We repeatedly measured the FMR spectra at a particular frequency and somehow managed to get the noisy spectra plotted in figure R1. The expt. data shown in figure R1 are fitted using Lorentzian function to evaluate the values of linewidth ( $\Delta H$ ) and resonance magnetic field ( $H_{\text{res}}$ ).

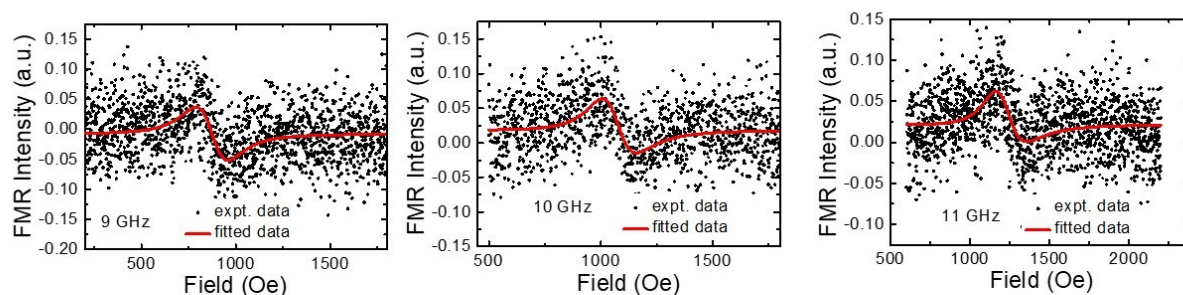

Figure R1: FMR spectra of sample S2 taken at the microwave frequencies 9, 10 and 10 GHz, respectively.
